# Supplementary material for: A systematic review of the quality of reporting of simulation studies about methods for the analysis of complex longitudinal patient-reported outcomes data
Source: Springer Nature journal article supplement (doi:10.1007/s11136-018-1861-0), 2018-04-20
Supplement: MOESM1 [file 15711544]

**Title: A Systematic Review of the Quality of Reporting of Simulation Studies about Methods for the Analysis of Complex Longitudinal Patient-Reported Outcomes Data**

Journal: Quality of Life Research

Authors: Hinds A, Sajobi TT, Sebille V, Sawatzky R, Lix LM

Corresponding Author: Lisa M Lix, University of Manitoba; lisa.lix@umanitoba.ca

**Supplementary Table. Objectives/aims and analysis methods for studies included in the systematic review.**

| # | Citation | Objective/Aim | Analysis Method/Model |
| --- | --- | --- | --- |
| 1 | Andrade, D. F., & Tavares, H. R. (2005). Item response theory for longitudinal data: Population parameter estimation. *Journal of Multivariate Analysis*, 95, 1–22. doi:10.1016/j.jmva.2004.07.005 | To propose IRT models to estimate and test ability distribution parameters over time. | IRT/Rasch |
| 2 | Bacci, S. (2012). Longitudinal data: Different approaches in the context of item-response theory models. *Journal of Applied Statistics*, 39(9), 2047–2065. doi:10.1080/02664763.2012.700451 | To analyze the pros and cons of using multidimensional and multilevel Rasch models. | IRT/Rasch |
| 3 | Blanchin, M., Hardouin, J. B., Neel, T. Le, Kubis, G., Blanchard, C., Mirallie, E., & Sebille, V. (2011). Comparison of CTT and Rasch-based approaches for the analysis of longitudinal Patient Reported Outcomes. *Statistics in Medicine*, 30(8), 825–838. doi:10.1002/sim.4153 | To compare CTT and Rasch-based approaches to analyze longitudinal PRO data. | CTT  IRT/Rasch |
| 4 | Blanchin, M., Hardouin, J.-B., Le Neel, T., Kubis, G., & Sebille, V. (2011). Analysis of longitudinal patient-reported outcomes with informative and non-informative dropout: Comparison of CTT and Rasch-based methods. *International Journal of Applied Mathematics & Statistics*, 24(SI-11A), 107–124. | To compare CTT and Rasch-based approaches to analyze longitudinal PRO and to study the impact of missing data due to participant dropout. | CTT  IRT/Rasch |
| 5 | Cho, S.-J., Cohen, A. S., Kim, S.-H., & Bottge, B. (2010). Latent transition analysis with a mixture item response theory measurement model. *Applied Psychological Measurement*, 34(7), 483–504. http://doi.org/10.1177/0146621610362978 | To describe a latent transition analysis model with a Rasch mixture model. | IRT/Rasch |
| 6 | Cole, D. A., Martin, N. C., & Steiger, J. H. (2005). Empirical and conceptual problems with longitudinal trait-state models: Introducing a trait- state–occasion model. *Psychological Medicine*, 10(1), 3–20. doi:10.1037/1082-989X.10.1.3 | To investigate some design and population characteristics that may be associated with improper trait-state-error model solutions; to provide evidence of an important limitation of the latent state-trait model with autoregression; and to present a latent trait-state-occasion model | SEM |
| 7 | de Bock, E., Hardouin, J., Blanchin, M., Le Neel, T., Kubis, G., Bonnaud-Antignac, A., … Sebille, V. (2016). Rasch-family models are more valuable than score-based approaches for analysing longitudinal patient-reported outcomes with missing data*. Statistical Methods in Medical Research*, 16, 1–21. doi:10.1177/0962280213515570 | To compare CTT and Rasch family models with possibly informative intermittent missing items. | CTT  Rasch/IRT |
| 8 | de Bock, E., Hardouin, J. B., Blanchin, M., Le Neel, T., Kubis, G., & Sebille, V. (2015). Assessment of score- and Rasch-based methods for group comparison of longitudinal patient-reported outcomes with intermittent missing data (informative and non-informative). *Quality of Life Research*, 24(1), 19–29. doi:10.1007/s11136-014-0648-1 | To compare methods based on CTT and IRT approaches with intermittent missing items. | CTT  Rasch/IRT |
| 9 | Diallo, T. M. O., Morin, A. J. S., & Parker, P. D. (2013). Statistical power of latent growth curve models to detect quadratic growth. *Behavior Research Methods*, 46(2), 357–371. doi:10.3758/s13428-013-0395-1 | To investigate the power of a latent curve model to detect the mean of the quadratic slope. | SEM |
| 10 | Estabrook, R. (2015). Evaluating measurement of dynamic constructs: Defining a measurement model of derivatives. *Psychological Methods*, 20(1), 117–141. doi:10.1037/a0034523 | To define and test a novel method for multivariate longitudinal measurement that directly models the structure of change. | SEM |
| 11 | Fan, X. (2003). Power of latent growth modeling for detecting group differences in linear growth trajectory parameters. *Structural Equation Modeling: A Multidisciplinary Journal*, 10(3), 380–400. doi:10.1207/S15328007SEM1003 | To compare latent growth models to repeated-measures analysis of variance for detecting group differences in growth parameters. | CTT  SEM |
| 12 | Fan, X., & Fan, X. (2005). Power of latent growth modeling for detecting linear growth: number of measurements and comparison with other analytic approaches. *The Journal of Experimental Education*, 73(2), 121–139. doi:10.3200/JEXE.73.2.121-139 | To examine the relationship between the number of repeated measurements and latent growth model power for detecting linear growth and to compare techniques for detecting linear growth. | CTT  SEM |
| 13 | Feddag, M., & Bacci, S. (2009). Pairwise likelihood for the longitudinal mixed Rasch model. *Computational Statistics and Data Analysis*, 53(4), 1027–1037. http://doi.org/10.1016/j.csda.2008.08.031 | To propose a pairwise method to estimate the fixed effect parameter and the variance component of the Rasch model. | IRT/Rasch |
| 14 | Feddag, M. L., Blanchin, M., Hardouin, J. B., & Sebille, V. (2014). Power analysis on the time effect for longitudinal Rasch model. *Journal of Applied Measurement*, 15(3), 292–301. | To evaluate the statistical power of the time effect for the longitudinal Rasch model. | IRT/Rasch |
| 15 | Feddag, M.-L., Grama, I., & Mesbah, M. (2003). Generalized estimating equations (GEE) for mixed logistic models. *Communications in Statistics - Theory and Methods*, 32(4), 851–874. doi:10.1081/STA-120018833 | To estimate fixed effects parameters and variance components in logistic mixed models; To propose estimating equations based on empirical pairwise covariances to estimate variance components. | IRT/Rasch  Generalized linear mixed model  Generalized estimating equations model |
| 16 | Feddag, M. L., & Mesbah, M. (2005). Generalized estimating equations for longitudinal mixed Rasch model. *Journal of Statistical Planning and Inference*, *129*(1), 159-179. | To propose a generalized estimating equations approach to estimate the fixed effects parameters and variance of the random effects in the longitudinal mixed Rasch model. | IRT/Rasch  Generalized linear mixed model |
| 17 | Fu, Z. H., Tao, J., Shi, N. Z., Zhang, M., & Lin, N. (2011). Analyzing longitudinal item response data via the pairwise fitting method. *Multivariate Behavioral Research*, *46*(4), 669-690. | To propose a pairwise modeling strategy to estimate item and population parameters in longitudinal studies. | IRT/Rasch |
| 18 | Geiser, C., Keller, B. T., & Lockhart, G. (2013). First- versus second-order latent growth curve models: Some insights from latent state-trait theory. *Structural Equation Modeling: A Multidisciplinary Journal*, 20(3), 479–503. doi:10.1080/10705511.2013.797832 | To examine latent growth curve models from the perspective of latent state-trait theory. | SEM |
| 19 | Geiser, C., Keller, B. T., Lockhart, G., Eid, M., Cole, D. a, & Koch, T. (2015). Distinguishing state variability from trait change in longitudinal data: The role of measurement (non)invariance in latent state-trait analyses. *Behavior Research Methods*, 47(1), 172–203. doi:10.3758/s13428-014-0457-z | To contrast two models: single trait-multistate model as a classical longitudinal state train model for measuring short-term state variability processes and multiple-indicator linear latent growth curve model. | SEM |
| 20 | Gorter, R., Fox, J.-P., & Twisk, J. W. R. (2015). Why item response theory should be used for longitudinal questionnaire data analysis in medical research. *BMC Medical Research Methodology*, 15(55), 1–12. doi:10.1186/s12874-015-0050-x | To examine the differences between IRT and CTT models. | CTT  IRT/Rasch |
| 21 | Holgado-Tello, F. P., Chacon-Moscoso, S., Sanduvete-Chaves, S., & Perez-Gil, J. A. (2016). A simulation study of threats to validity in quasi-experimental designs: Interrelationship between design, measurement, and analysis. *Frontiers in Psychology*, 7, 1–9. doi:10.3389/fpsyg.2016.00897 | To illustrate conceptual problems of threats to validity through causal analyses using SEM. | SEM |
| 22 | Hamon, A., & Iovleff, S. (2003). Three stochastic versions of the EM algorithm for estimating longitudinal Rasch model. *Communications in Statistics – Simulation and Computation,* 32(2), 275–295. doi:10.1081/SAC-120017492 | To propose an extension of the Rasch model to the case of repeated measurements of quality of life. | Rasch/IRT |
| 23 | Huang, H.-Y. (2015). A multilevel higher order item response theory model for measuring latent growth in longitudinal data. *Applied Psychological Measurement*, 39(5), 362–372. doi:10.1177/0146621614568112 | To propose a general class of multilevel higher order item response theory models for longitudinal data. | Rasch/IRT |
| 24 | Jeon, M., & Rabe-Hesketh, S. (2016). An autoregressive growth model for longitudinal item analysis. *Psychometrika*, 81(3), 830-850. doi:10.1007/s11336-015-9489-2 | To propose an autoregressive growth model for longitudinal analysis that accounts for local dependence over time. | Rasch/IRT |
| 25 | Kim, E. S., & Willson, V. L. (2014). Measurement invariance across groups in latent growth modeling. *Structural Equation Modeling: A Multidisciplinary Journal*, 21(3), 408–424. doi: 10.1080/10705511.2014.915374 | To investigate the effect of measurement non-invariance across groups on parameter estimates in latent growth models. | SEM |
| 26 | Kim, E. S., & Willson, V. L. (2014). Testing measurement invariance across groups in longitudinal data: multigroup second-order latent growth model. *Structural Equation Modeling: A Multidisciplinary Journal*, 21(4), 566–575. doi:10.1080/10705511.2014.919821 | To examine the performance of multigroup second-order latent growth modeling in testing measurement invariance across groups. | SEM |
| 27 | Koch, T., Schultze, M., Eid, M., & Geiser, C. (2014). A longitudinal multilevel CFA-MTMM model for interchangeable and structurally different methods. *Frontiers in Psychology*, 5, 1–19. doi:10.3389/fpsyg.2014.00311 | To extend the spectrum of current longitudinal modeling approaches for longitudinal multi-trait-multimethod analysis. | SEM |
| 28 | Kohli, N., Harring, J. R., & Zopluoglu, C. (2016). A finite mixture of nonlinear random coefficient models for continuous repeated measures data. *Psychometrika*, 81(3), 851–880. doi:10.1007/s11336-015-9462-0 | To extend random coefficient models with intrinsically nonlinear functions to a framework that integrates features of finite mixture models. | Latent class |
| 29 | Kwok, O.-M., Luo, W., & West, S. G. (2010). Using modification indexes to detect turning points in longitudinal data: A Monte Carlo study. *Structural Equation Modeling: A Multidisciplinary Journal*, 17(2), 216–240. doi:10.1080/10705511003659359 | To examine the effectiveness of using modification indexes to detect potential turning points in longitudinal data. | SEM |
| 30 | Lowy, A., & Bernhard, J. (2004). Quantitative assessment of changes in patients’ constructs of quality of life: an application of multilevel models. *Quality of Life Research*, 13(7), 1177–1185. doi:10.1023/B:QURE.0000037510.17893.d2 | To introduce an alternative approach using multilevel models to detect response shift. | Response shift: SEM |
| 31 | Luo, S., Ma, J., & Kieburtz, K. D. (2013). Robust Bayesian inference for multivariate longitudinal data by using normal/independent distributions. *Statistics in Medicine*, *32*(22), 3812-3828. | To propose a robust Bayesian parametric method for multilevel item response theory models. | IRT/Rasch |
| 32 | Mayo, N. E., Scott, S. C., Dendukuri, N., Ahmed, S., & Wood-Dauphinee, S. (2008). Identifying response shift statistically at the individual level. *Quality of Life Research*, 17(4), 627–639. doi:10.1007/s11136-008-9329-2 | To explore whether a longitudinal comparison between reported and predicted health could be used as a method of identifying subjects who potentially experience response shift. | Response shift: Group-based trajectory analysis |
| 33 | Nestler, S. (2014). How the 2SLS/IV estimator can handle equality constraints in structural equation models: A system-of-equations approach. *British Journal of Mathematical and Statistical Psychology*, 67(2), 353–369. doi:10.1111/bmsp.12023 | To present a two-stage least squares/instrumental variables estimator for SEM | SEM |
| 34 | Rhemtulla, M., Jia, F., Wu, W., & Little, T. D. (2014). Planned missing designs to optimize the efficiency of latent growth parameter estimates. *International Journal of Behavioral Development*, 38(5), 423-434. doi:10.1177/0165025413514324 | To examine the performance of planned missing designs for correlated latent growth curve models. | SEM |
| 35 | Rouquette, A., Côté, S. M., Hardouin, J.-B., & Falissard, B. (2016). Rasch modelling to deal with changes in the questionnaires used during long-term follow-up of cohort studies: A simulation study. *BMC Medical Research Methodology*, 16(105), 1–9. doi:10.1186/s12874-016-0211-6 | To compare the performances of a statistical method for the analysis of longitudinal data applied to the raw score, to the standardized score and to the latent variable score according to the number of shared items across questionnaires over time. | IRT/Rasch  Latent class |
| 36 | Sajobi, T. T., Lix, L. M., Singh, G., Lowerison, M., Engbers, J., & Mayo, N. E. (2015). Identifying reprioritization response shift in a stroke caregiver population: a comparison of missing data methods. *Quality of Life Research*, 24(3), 529–540. doi:10.1007/s11136-014-0824-3 | To investigate the effect of the choice of methods on conclusions about the presence of reprioritization response shift. | Response shift: Relative importance (discriminant analysis and logistic regression) |
| 37 | Sterba, S. K. (2017). Pattern mixture models for quantifying missing data uncertainty in longitudinal invariance testing. *Structural Equation Modeling: A Multidisciplinary Journal*, 24(2), 283–300. doi:10.1080/10705511.2016.1250635 (published online in 2016) | To develop and demonstrate pattern mixture models for quantifying uncertainty in longitudinal invariance testing that is due to an unknown but potentially non-ignorable dropout mechanism | SEM |
| 38 | Tan, E. S., Ambergen, A. W., Does, R. J. M. M., & Imbos, T. (1999). Approximations of normal IRT models for change. *Journal of Educational and Behavioral Statistics*, *24*(2), 208-223. | To study the one parameter item response theory model with normal item characteristic curves in a longitudinal context. | IRT/Rasch |
| 39 | Tavares, H. R., & Andrade, D. F. (2006). Item response theory for longitudinal data: Item and population ability parameters estimation. *Sociedad de Estadistica e Investigacion Operativa*, 15(1), 97–123. | To present a method to jointly estimate item and population parameters over time. | IRT/Rasch |
| 40 | Vanier, A., Sebille, V., Blanchin, M., Guilleux, A., & Hardouin, J. B. (2015). Overall performance of Oort’s procedure for response shift detection at item level: a pilot simulation study. *Quality of Life Research*, 24(8), 1799–1807. doi:10.1007/s11136-015-0938-2 | To examine Oort’s procedure for SEM at the item level with binary items and to assess the impact of using different information criteria for global assessment of response shift. | Response shift: SEM |
| 41 | Verhagen, J., & Fox, J. P. (2013). Longitudinal measurement in health-related surveys. A Bayesian joint growth model for multivariate ordinal responses. *Statistics in Medicine*, 32(17), 2988–3005. doi:10.1002/sim.5692 | To propose a measurement model to detect change in item characteristics over occasions. | IRT/Rasch |
| 42 | Wilson, M., Zheng, X., & McGuire, L. (2012). Formulating latent growth using an explanatory item response model approach*. Journal of Applied Measurement*, 13(1), 1–22. | To propose a latent growth item response model. | IRT/Rasch |

Note. IRT = Item Response Theory, SEM = Structural Equation Modeling, CTT = Classical Test Theory
